# Supplementary material for: Changing Ecotypes of Dengue Virus 2 Serotype in Nigeria and the Emergence of Cosmopolitan and Asian I Lineages, 1966–2019
Source: MDPI journal article supplement (doi:10.3390/vaccines11030547), 2023-02-25
Supplement: s1 [file s1]

**Supplementary Table S1: Dengue virus 2 isolates from across the different continents of the world**

| SN | Serotype | Accession No. | Strain       | Year | Location         | Source     |
|----|----------|---------------|--------------|------|------------------|------------|
| 1  | DENV-2   | MT982918      | Sylvatic     | 2019 | Togo             | Human      |
| 2  | DENV-2   | MW979758      | Sylvatic     | 2020 | Cameroon         | Human      |
| 3  | DENV-2   | EF457904      | Sylvatic     | 1970 | Senegal          | Aedes spp. |
| 4  | DENV-2   | EF105382      | Sylvatic     | 1980 | Burkina Faso     | Aedes spp. |
| 5  | DENV-2   | EF457905      | Sylvatic     | 1974 | Senegal          | Aedes spp. |
| 6  | DENV-2   | AF276619      | Sylvatic     | 2000 | China            | Human      |
| 7  | DENV-2   | AF359579      | Sylvatic     | 1999 | China            | Human      |
| 8  | DENV-2   | EF105378      | Sylvatic     | 1981 | Guinea           | Aedes spp. |
| 9  | DENV-2   | EF105380      | Sylvatic     | 1980 | Cote D'ivoire    | Aedes spp. |
| 10 | DENV-2   | AY037116      | Sylvatic     | 1993 | Australia        | Human      |
| 11 | DENV-2   | AF410378      | Sylvatic     | 1992 | Saudi Arabia     | Human      |
| 12 | DENV-2   | AY858035      | Sylvatic     | 2004 | Indonesia        | Human      |
| 13 | DENV-2   | KY627762      | Sylvatic     | 2016 | Burkina Faso     | Human      |
| 14 | DENV-2   | AY702040      | Sylvatic     | 1986 | Columbia         | Human      |
| 15 | DENV-2   | AY744147      | Sylvatic     | 2004 | Tonga            | Human      |
| 16 | DENV-2   | EU056810      | Sylvatic     | 1983 | Burkina Faso     | Human      |
| 17 | DENV-2   | LC206003      | Sylvatic     | 2016 | Burkina Faso     | Human      |
| 18 | DENV-2   | AF276619      | Sylvatic     | 2000 | China            | Human      |
| 19 | DENV-2   | OL414765      | Sylvatic     | 2020 | Cambodia         | Human      |
| 20 | DENV-2   | MH822948      | Sylvatic     | 2012 | India            | Human      |
| 21 | DENV-2   | MH822956      | Sylvatic     | 2018 | India            | Human      |
| 22 | DENV-2   | MK783199      | Sylvatic     | 2018 | China            | Human      |
| 23 | DENV-2   | MK783210      | Sylvatic     | 2018 | China            | Human      |
| 24 | DENV-2   | MK783203      | Sylvatic     | 2018 | China            | Human      |
| 25 | DENV-2   | AF038403      | Asia 1       | 1944 | Papua New Guinea | Human      |
| 26 | DENV-2   | M20558        | Asia 1       | 1983 | Jamaica          | Human      |
| 27 | DENV-2   | AF100464      | Asia 1       | 1996 | Thailand         | Human      |
| 28 | DENV-2   | KU725663      | Asia 1       | 2016 | Singapore        | Human      |
| 29 | DENV-2   | KU725664      | Asia 1       | 2016 | Singapore        | Human      |
| 30 | DENV-2   | AF100147      | Asia 1       | 1995 | Mexico           | Human      |
| 31 | DENV-2   | DQ181806      | Asia 1       | 1974 | Thailand         | Human      |
| 32 | DENV-2   | AF100464      | Asia 1       | 1996 | Thailand         | Human      |
| 33 | DENV-2   | AF100150      | Asia 1       | 1991 | Venezuela        | Human      |
| 34 | DENV-2   | LC666719      | Cosmopolitan | 2017 | Ghana            | Human      |
| 35 | DENV-2   | MG937762      | Cosmopolitan | 2017 | Ghana            | Human      |
| 36 | DENV-2   | GU131843      | Cosmopolitan | 1986 | Burkina Faso     | Human      |
| 37 | DENV-2   | KY627763      | Cosmopolitan | 2016 | Burkina Faso     | Human      |
